# Supplementary material
Source: MDPI journal article supplement (https://www.mdpi.com/2673-6284/10/4/24)

## Supplementary Material

# Cell-Free Protein Synthesis by Diversifying Bacterial Transcription Machinery

Marina Snapyan <sup>1\*</sup>, Sylvain Robin <sup>2</sup>, Garabet Yeretssian <sup>1</sup>, Michèle Lecocq <sup>1,3</sup>, Frédéric Marc <sup>2</sup>, Vehary Sakanyan <sup>1,2,3\*\*</sup>

Table S1. Oligonucleotide primers used for PCR amplification of *T. maritima* genes

| Oligonucleotide primer | Sequence starting from 5' to 3'              |
|------------------------|----------------------------------------------|
| Tm Xyl 0808-His        | ATGCATCATCATCATCATCATGGAGGGACCCTTTTGAACAT    |
| Tm Xyl 0808-down       | CTCGTGATCGGAACTGATGAG                        |
| Tm LacI 1856-His       | ATGCATCATCATCATCATCATCCAACAATAGAAGATGTCG     |
| Tm LacI 1856-down      | GACCACTCGATCTGAACATCC                        |
| Tm GntR 0439-His       | ATGCATCATCATCATCATCATATAAAAAAATCGAAGTGGACCTC |
| Tm0439-GntR-down       | GAACGAAACACCCTCCGCC                          |

Table S2. Oligonucleotide primers used for PCR amplification of promoter-operator regions

| Oligonucleotide | Operator DNA                       | DNA size | Sequence from 5'-extremity     |
|-----------------|------------------------------------|----------|--------------------------------|
| ArgRTn-Up       | <i>T. neapolitana argR</i>         | 148 bp   | IRD700-TGTTACTCTTGAGTTACCAAAAC |
| ArgRTn-down     |                                    |          | TTATGAGTTCCTGTCTTC             |
| XylRo-104UP     | <i>E. coli xylFo</i>               | 104 bp   | IRD800-GGTCATAAATCAAGAAATAAA   |
| XylRo-down      |                                    |          | CACCGCGATAAACGTAACC            |
| LacIo-68UP      | <i>E. coli lacIo</i>               | 68 bp    | IRD700-GCTTCCGGCTCGTATGT       |
| LacIo-down      |                                    |          | GGTCATAGCTGTTTCCTGTG           |
| GntRo-68UP      | <i>E. coli gntKo</i>               | 68 bp    | IRD800-GTCCGGCTGGACAATGTT      |
| GntRo-down      |                                    |          | GTGGTGCCCCCACAATAC             |
| ArgCo-UP        | <i>B. stearothermophilus argCo</i> | 100 bp   | CTTAGGGAGGGGCAAGAA             |
| ArgCo-down      |                                    |          | CCCGTATGCCTCATGTAG             |

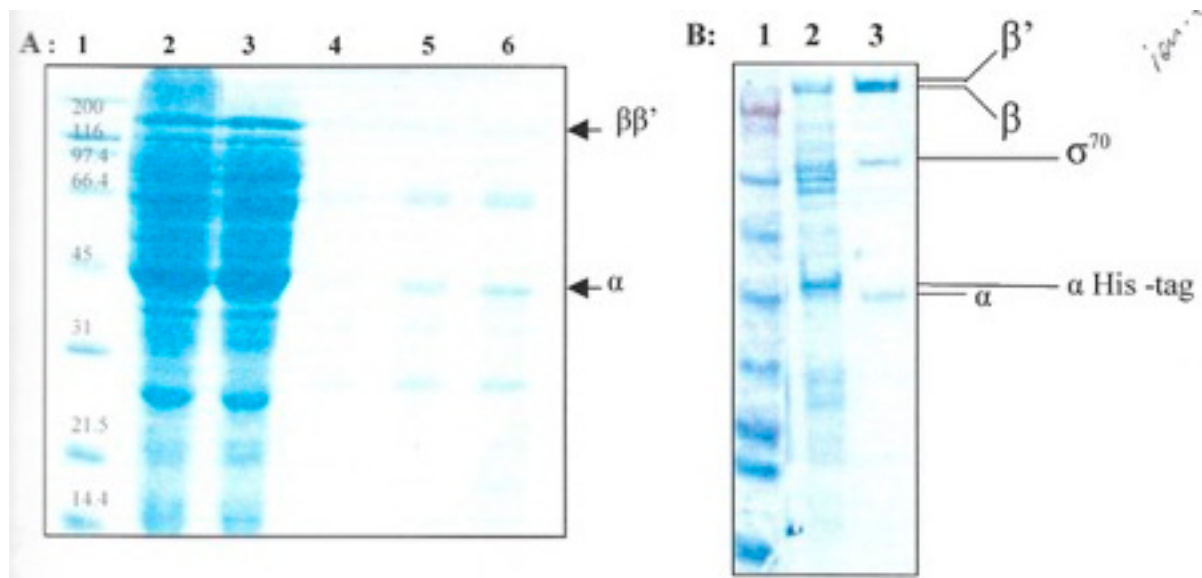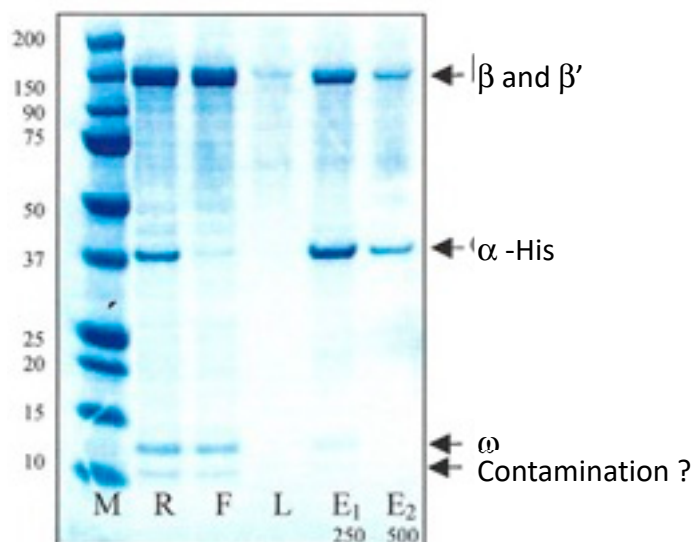

Supplement: s1 [file s1]
